# Supplementary material
Source: Springer Nature journal article supplement (https://www.springermedizin.de/resource/supplementary/13256_2007_190_MOESM3_ESM.pdf/9646088)

Combine image created by Mx8000IDT

[A]

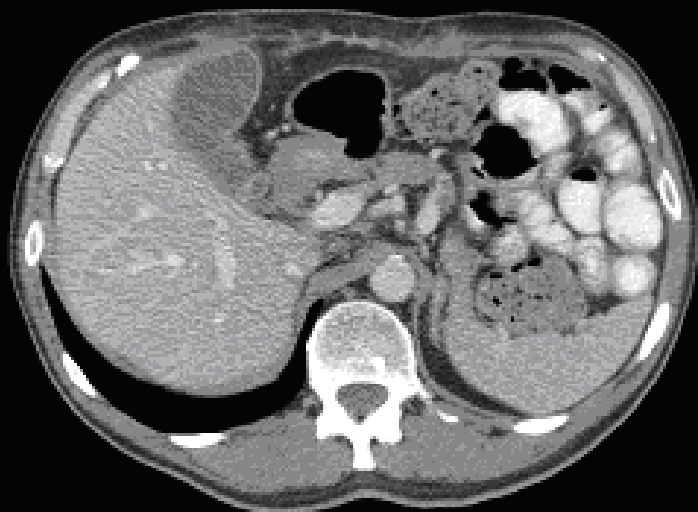

[B]

Supplement: MOESM3 [file 9646088]
